# Supplementary material
Source: MDPI journal article supplement (https://www.mdpi.com/1424-2818/13/5/202)
Supplement: s1 [file s1]

**Table S1:** Species captured, their guild, their capturing location, number of individuals per species per location and references to support their classification into guilds.

| Species                      | Scientific Name                     | Guild       | Location | N | Reference(s) |
|------------------------------|-------------------------------------|-------------|----------|---|--------------|
| Green Headed Sunbird         | <i>Cyanomitra verticalis</i>        | Nectarivore | Naraguta | 1 | b,g          |
| Scarlet-chested Sunbird      | <i>Chalcomitra senegalensis</i>     | Nectarivore | Amurum   | 2 | b,g          |
| Scarlet-chested Sunbird      | <i>Chalcomitra senegalensis</i>     | Nectarivore | Naraguta | 4 | b,g          |
| Variable sunbird             | <i>Cinnyris venustus</i>            | Nectarivore | Amurum   | 1 | b,g          |
| Bearded Barbet               | <i>Lybius dubius</i>                | Frugivore   | Amurum   | 1 | a            |
| Speckled Mousebird           | <i>Colius striatus</i>              | Frugivore   | Naraguta | 2 | a,j          |
| Speckled Mousebird           | <i>Colius striatus</i>              | Frugivore   | Amurum   | 3 | a,j          |
| Yellow-Fronted Tinkerbird    | <i>Pogoniulus chrysoconus</i>       | Frugivore   | Naraguta | 7 | a            |
| Yellow-Fronted Tinkerbird    | <i>Pogoniulus chrysoconus</i>       | Frugivore   | Amurum   | 1 | a            |
| Adamawa Turtle dove          | <i>Streptopelia hypopyrrha</i>      | Granivore   | Naraguta | 1 | e,i          |
| Northern Red Bishop          | <i>Euplectes franciscanus</i>       | Granivore   | Naraguta | 5 | c            |
| Red-billed Firefinch         | <i>Lagonosticta senegala</i>        | Granivore   | Naraguta | 5 | c            |
| Red-Cheeked Cordon Bleu      | <i>Uraeginthus bengalus</i>         | Granivore   | Amurum   | 5 | c            |
| Red-Cheeked Cordon Bleu      | <i>Uraeginthus bengalus</i>         | Granivore   | Amurum   | 6 | c            |
| Red-billed Firefinch         | <i>Lagonosticta senegala</i>        | Granivore   | Naraguta | 3 | c            |
| African Thrush               | <i>Turdus pelios</i>                | Omnivores   | Amurum   | 6 | d            |
| African Thrush               | <i>Turdus pelios</i>                | Omnivores   | Naraguta | 3 | d            |
| Black Necked Weaver          | <i>Ploceus nigricollis</i>          | Omnivores   | Naraguta | 1 | c            |
| Common Bulbul                | <i>Pycnonotus barbatus</i>          | Omnivores   | Amurum   | 1 | b            |
| Common Bulbul                | <i>Pycnonotus barbatus</i>          | Omnivores   | Naraguta | 4 | b            |
| Little Weaver                | <i>Ploceus luteolus</i>             | Omnivores   | Naraguta | 2 | c            |
| Mocking cliff Chat           | <i>Thamnolaea cinnamomeiventris</i> | Omnivores   | Amurum   | 1 | c            |
| Northern Grey Headed Sparrow | <i>Passer griseus</i>               | Omnivores   | Amurum   | 1 | c            |
| Spectacled Weaver            | <i>Ploceus ocularis</i>             | Omnivores   | Naraguta | 1 | c            |
| Village Weaver               | <i>Ploceus cucullatus</i>           | Omnivores   | Amurum   | 5 | c            |
| African paradise flycatcher  | <i>Terpsiphone viridis</i>          | Insectivore | Naraguta | 1 | d            |
| African paradise flycatcher  | <i>Terpsiphone viridis</i>          | Insectivore | Amurum   | 1 | d            |
| Blue flycatcher              | <i>Elminia longicauda</i>           | Insectivore | Naraguta | 1 | d            |
| Cardinal woodpecker          | <i>Dendropicos fuscescens</i>       | Insectivore | Amurum   | 1 | f            |
| Familiar Chat                | <i>Oenanthe familiaris</i>          | Insectivore | Amurum   | 1 | h            |
| Grey-backed Camaroptera      | <i>Camaroptera brevicaudata</i>     | Insectivore | Amurum   | 2 | d            |
| Northern black flycatcher    | <i>Melaenornis edolioides</i>       | Insectivore | Naraguta | 1 | d            |
| Rock-loving Cisticola        | <i>Cisticola emini</i>              | Insectivore | Amurum   | 1 | d            |
| Tawny-flanked prinia         | <i>Prinia subflava</i>              | Insectivore | Amurum   | 2 | d            |
| Tawny-flanked prinia         | <i>Prinia subflava</i>              | Insectivore | Naraguta | 1 | d            |
| Yellow White-eye             | <i>Zosterops senegalensis</i>       | Insectivore | Naraguta | 3 | b            |

<sup>a</sup> Fry CH, Keith S, Urban EK (eds) 1988. The birds of Africa, Vol 3. Academic Press, London

<sup>b</sup> Fry CH, Keith S, Urban EK (eds) 2000. The birds of Africa, Vol 4. Academic Press, London

<sup>c</sup> Urban EK, Fry CH, Keith S, (eds) 1997. The birds of Africa Vol 5. Academic Press, London

<sup>d</sup> Urban EK, Fry CH, Keith S, (eds) 1986. The birds of Africa Vol 2. Academic Press, London

<sup>e</sup> Fry CH, Keith S, (eds) 2004. The birds of Africa Vol 7. Christopher Helm, London

<sup>f</sup> del Hoyo, J., Elliott, A., Sargatal, J., Christie, D.A. Handbook of the birds of the World (Jacanas to Woodpeckers) Vol. 7. *Lynx Edicions*. 2002. ISBN 8487334377

<sup>g</sup> Pettet, A. Seasonal changes in nectar-feeding by birds at Zaria, Nigeria. *Ibis* **1977**, 119: 291-308

<sup>h</sup> Hockey, P.A.R., Dean, W.R.J., Ryan, P.G. Roberts - Birds of southern Africa, VII ed. The Trustees of the John Voelcker Bird Book Fund **2005**, Cape Town

<sup>i</sup> Wood, B. Observations of the Adamawa Turtle Dove. *Bull. Br. Orni. Club* **1975**, 95: 68-73

<sup>j</sup> Bartholomew, C.A., Trost, C.H. Temperature regulation in the Speckled Mousebird, *Colius striatus*. *Condor* **1970**, 72: 141-146

**Table S2:** relative Bayesian Standard Ellipse Area Overlap (in percentage) for all combinations of isotopes ( $\delta^2\text{H}$  &  $\delta^{13}\text{C}$ ,  $\delta^2\text{H}$  &  $\delta^{15}\text{N}$ , and  $\delta^{13}\text{C}$  &  $\delta^{15}\text{N}$ ) for all the different guilds.

Overlap was calculated as the percentage of area shared of each guild's ellipse with each other guild's ellipse. Shown are Median and (CI) – credible interval of 95%.

| <b>Guild</b>                | <b><math>\delta^2\text{H}</math> - <math>\delta^{13}\text{C}</math> overlap (%)</b> | <b><math>\delta^2\text{H}</math> - <math>\delta^{15}\text{N}</math> overlap (%)</b> | <b><math>\delta^{13}\text{C}</math> - <math>\delta^{15}\text{N}</math> overlap (%)</b> |
|-----------------------------|-------------------------------------------------------------------------------------|-------------------------------------------------------------------------------------|----------------------------------------------------------------------------------------|
| Nectarivores – Frugivores   | 26.7 (25.7 – 30.6)                                                                  | 44.3 (43.1 – 46.5)                                                                  | 27.1 (25.8 – 29.8)                                                                     |
| Nectarivores – Granivores   | 0.0 (0.0 – 0.0) *                                                                   | 8.8 (8.1 – 9.9)                                                                     | 0.0 (0.0 – 0.0)                                                                        |
| Nectarivores – Omnivores    | 19.4 (19.4 – 21.6)                                                                  | 36.1 (34.9 – 38.3)                                                                  | 11.1 (11.4 – 13.9)                                                                     |
| Nectarivores – Insectivores | 26.2 (25.9 – 29.0)                                                                  | 34.6 (34.1 – 37.7)                                                                  | 22.8 (22.0 – 24.4)                                                                     |
| Frugivores – Granivores     | 0.0 (0.0 – 0.0) *                                                                   | 20.7 (19.3 – 21.3)                                                                  | 0.0 (0.0 – 0.0)                                                                        |
| Frugivores – Omnivores      | 17 (16.2 – 17.5)                                                                    | 50.6 (48.7 – 51.5)                                                                  | 14.8 (14.5 – 16.5)                                                                     |
| Frugivores – Insectivores   | 20.1 (19.1 – 20.9)                                                                  | 35.7 (34.3 – 37.1)                                                                  | 22.2 (21.8 – 23.7)                                                                     |
| Granivores – Omnivores      | 7.3 (7.1 – 8.6)                                                                     | 20.5 (19.6 – 21.2)                                                                  | 4.8 (4.8 – 6.0)                                                                        |
| Granivores – Insectivores   | 0.0 (0.0 – 0.0) *                                                                   | 5.6 (5.5 – 7.0)                                                                     | 3.0 (3.4 – 5.1)                                                                        |
| Omnivores – Insectivores    | 48.8 (47.4 – 50.7)                                                                  | 31.4 (31.4 – 34.0)                                                                  | 32.3 (32.7 – 36.4)                                                                     |

\* <  $1\text{e}^{-10}$
